# Supplementary material for: Spring Phenological Sensitivity to Climate Change in the Northern Hemisphere: Comprehensive Evaluation and Driving Force Analysis
Source: MDPI journal article supplement (doi:10.3390/rs13101972), 2021-05-18
Supplement: s1 [file s1]

Archive with 1 entries (1 files):
- remotesensing-1166172-supplementary.pdf
